# Supplementary figures and images for: Oral versus intramuscular administration of vitamin B12 for vitamin B12 deficiency in primary care: a pragmatic, randomised, non-inferiority clinical trial (OB12)
Source: PubMed Central journal article supplement — BMJ Open. 2020 Aug 20;10(8):e033687. doi: 10.1136/bmjopen-2019-033687 (PMC7440823; doi:10.1136/bmjopen-2019-033687), 2020-08-20

## Supplement 4: Vitamin B12 mean levels by treatment route

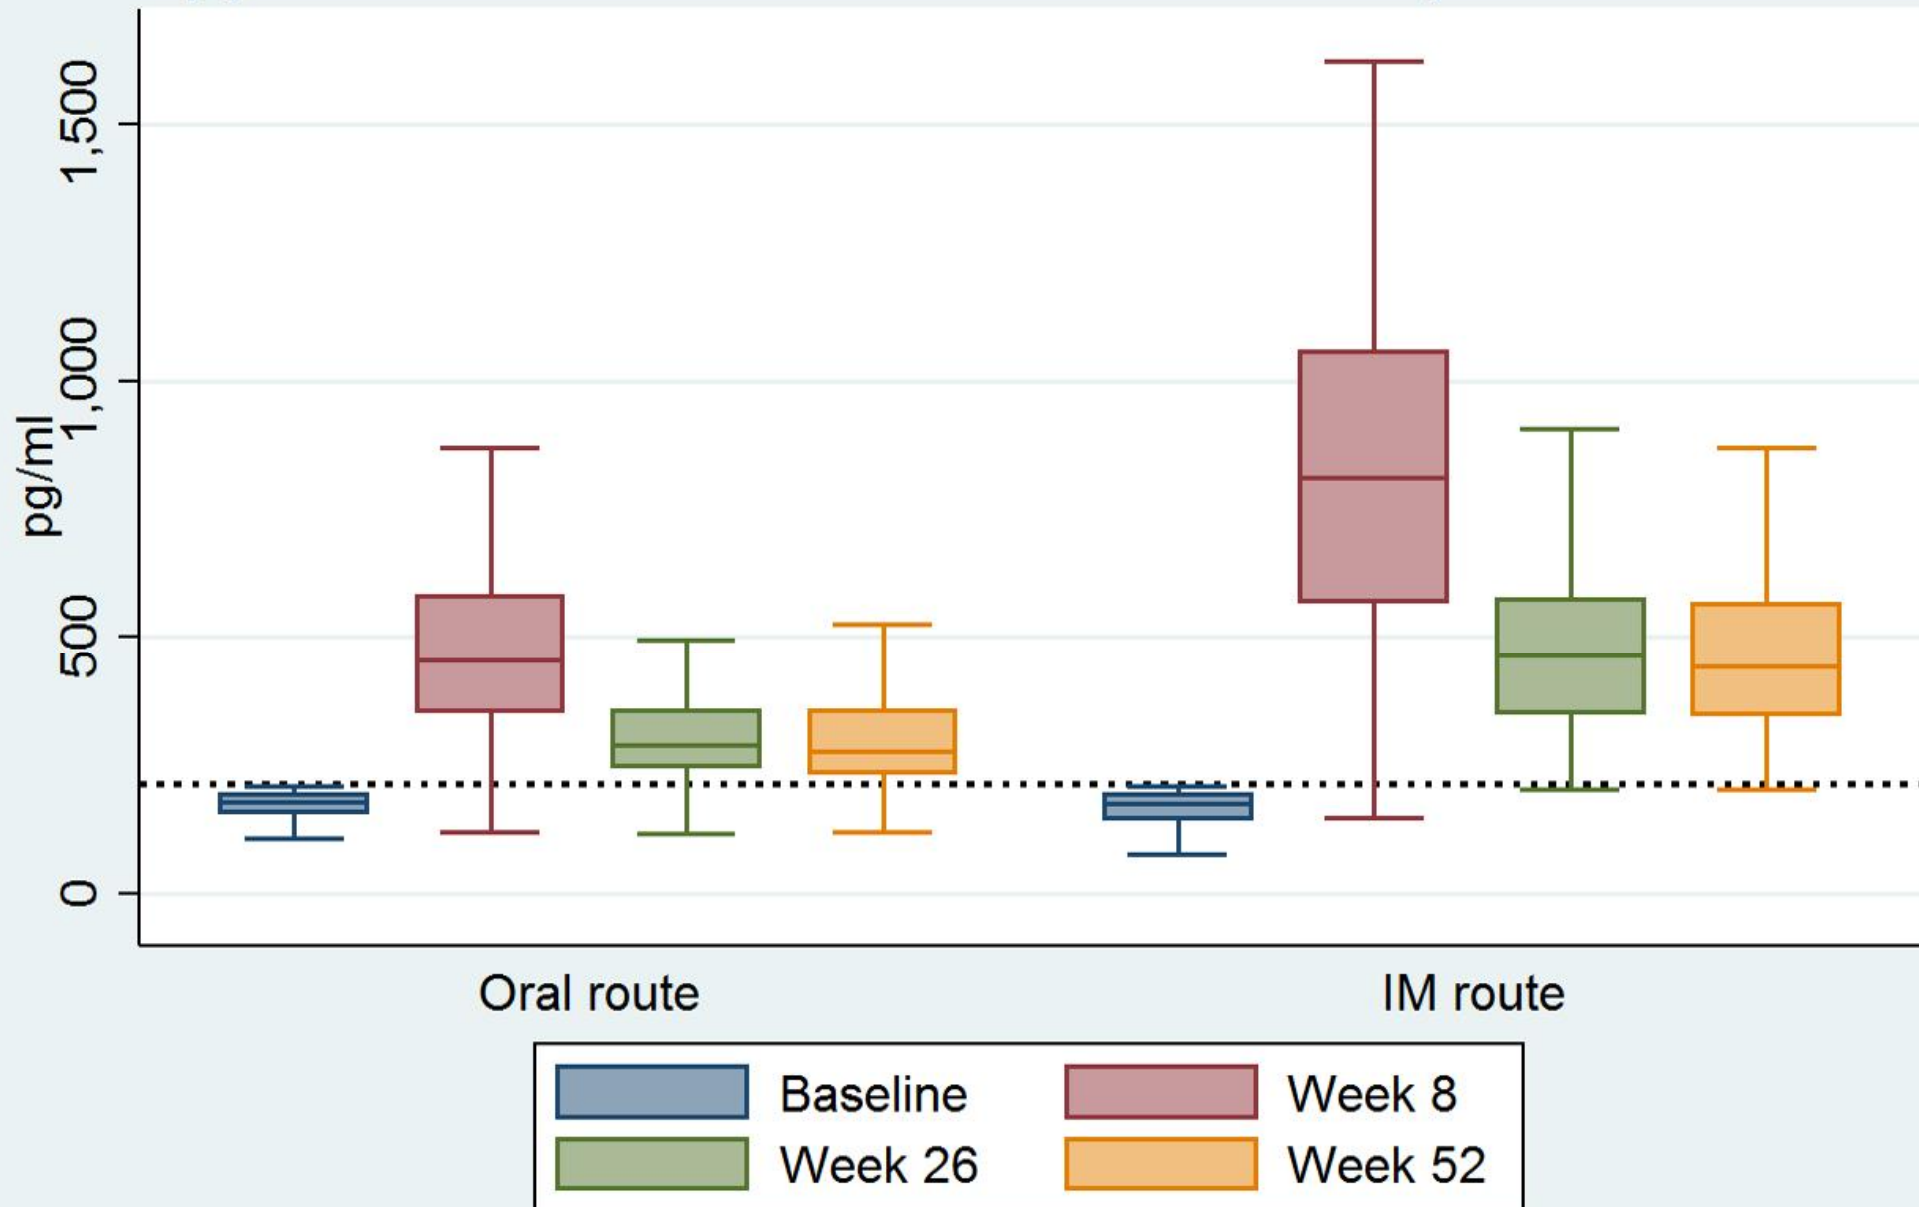

excludes outside values

Supplement: bmjopen-2019-033687supp004.pdf [file bmjopen-2019-033687supp004.pdf]
